# Supplementary material
Source: PubMed Central journal article supplement (PMC7864788)

# THE LANCET

## Public Health

### Supplementary appendix

This appendix formed part of the original submission and has been peer reviewed. We post it as supplied by the authors.

Supplement to: Gaudart J, Landier J, Huiart L, et al. Factors associated with the spatial heterogeneity of COVID-19 in France: a nationwide geo-epidemiological study. *Lancet Public Health* 2021; published online Feb 5. [http://dx.doi.org/10.1016/S2468-2667\(21\)00006-2](http://dx.doi.org/10.1016/S2468-2667(21)00006-2).

# Factors associated with the spatial heterogeneity of COVID-19 in France: a nationwide ecological study

## Appendix 1: List of data used in the study, at the department level

**Table A1.1 – List of data used in the study.**

| Data used in the study (and details)                                                                                                                                                                                                                                   | Data transformation | Inclusion in GAM models |                       |                      |
|------------------------------------------------------------------------------------------------------------------------------------------------------------------------------------------------------------------------------------------------------------------------|---------------------|-------------------------|-----------------------|----------------------|
|                                                                                                                                                                                                                                                                        |                     | Incidence ratio (SIR)   | Mortality ratio (SMR) | Fatality ratio (SFR) |
| <b>Daily in-hospital COVID-19 data per department between March 19<sup>th</sup> and May 11<sup>th</sup> 2020</b>                                                                                                                                                       |                     |                         |                       |                      |
| Cases                                                                                                                                                                                                                                                                  | no                  | outcome                 | cofactor              | offset               |
| Deaths                                                                                                                                                                                                                                                                 | no                  | no                      | outcome               | outcome              |
| <b>Daily COVID-19-associated deaths per department from February 7<sup>th</sup> 2020</b>                                                                                                                                                                               |                     |                         |                       |                      |
| Relative lag between the first COVID-19 associated death and the March 17 <sup>th</sup> lockdown                                                                                                                                                                       | yes                 | cofactor                | cofactor              | cofactor             |
| <b>Total population</b>                                                                                                                                                                                                                                                | no                  | offset                  | offset                |                      |
| <b>Population age structure estimated in 2020 per department</b>                                                                                                                                                                                                       | classification      | cofactor                | cofactor              | cofactor             |
| Population per 5-year and sex strata                                                                                                                                                                                                                                   |                     |                         |                       |                      |
| <b>Intensive-care capacity</b>                                                                                                                                                                                                                                         | no                  | no                      | cofactor              | cofactor             |
| Number of intensive-care beds (ICU beds) in 2018                                                                                                                                                                                                                       |                     |                         |                       |                      |
| <b>Number of new chloroquine and hydroxychloroquine dispensations in pharmacies from January 1<sup>st</sup> to April 19<sup>th</sup> 2020</b>                                                                                                                          | no                  | cofactor                | cofactor              | cofactor             |
| <b>Baseline population health and healthcare services</b>                                                                                                                                                                                                              | classification      | cofactor                | cofactor              | cofactor             |
| Basal number of total deaths per department between March 19 <sup>th</sup> and May 11 <sup>th</sup> 2018 and 2019                                                                                                                                                      |                     |                         |                       |                      |
| Availability of healthcare resources: densities of medical doctors, general practitioners, nurses, pharmacies and hospital beds per inhabitants                                                                                                                        |                     |                         |                       |                      |
| Subsidized medical or dependency insurance: proportion of the population covered by Universal Health Insurance (CMU), proportion of the population receiving home nursing care, proportion of the elderly population recipient of the autonomy allowance (APA) at home |                     |                         |                       |                      |
| Ageing index                                                                                                                                                                                                                                                           |                     |                         |                       |                      |
| Proportion of hospital stays in endocrinology, cardiology, pneumology and medicine wards                                                                                                                                                                               |                     |                         |                       |                      |
| <b>Economic indicators</b>                                                                                                                                                                                                                                             | classification      | cofactor                | no                    | no                   |
| Poverty ratio                                                                                                                                                                                                                                                          |                     |                         |                       |                      |
| Median standard of living                                                                                                                                                                                                                                              |                     |                         |                       |                      |
| Unemployment ratio                                                                                                                                                                                                                                                     |                     |                         |                       |                      |
| Housing allowance ratio                                                                                                                                                                                                                                                |                     |                         |                       |                      |
| Earned income supplement (RSA) ratio                                                                                                                                                                                                                                   |                     |                         |                       |                      |
| Average amount of the autonomy allowance (APA)                                                                                                                                                                                                                         |                     |                         |                       |                      |
| Social assistance ratio                                                                                                                                                                                                                                                |                     |                         |                       |                      |
| <b>Urbanization</b>                                                                                                                                                                                                                                                    | classification      | cofactor                | no                    | no                   |
| Proportion of the population living in metropolitan cities                                                                                                                                                                                                             |                     |                         |                       |                      |

|                                                                                                                                                                                       |                |          |          |          |
|---------------------------------------------------------------------------------------------------------------------------------------------------------------------------------------|----------------|----------|----------|----------|
| Proportion of the population living in multipolar cities                                                                                                                              |                |          |          |          |
| Proportion of the population living in remote communes                                                                                                                                |                |          |          |          |
| Proportion of the population living in other communes                                                                                                                                 |                |          |          |          |
| Roads density outside urban areas                                                                                                                                                     |                |          |          |          |
| Surface area                                                                                                                                                                          |                |          |          |          |
| <b>Climate (% of surface area)</b>                                                                                                                                                    | classification | cofactor | no       | no       |
| Mountain; semi-continental and sub-montane; modified oceanic of centre and north plains; altered oceanic; franc oceanic; altered Mediterranean; south-west basin; franc Mediterranean |                |          |          |          |
| <b>Spatial</b>                                                                                                                                                                        | spline         | cofactor | cofactor | cofactor |
| Centroid coordinates                                                                                                                                                                  |                |          |          |          |

GAM, generalized additive models.

Outcome in GAM: SIR, standardized incidence ratio; SMR, standardized mortality ratio; SFR, standardized fatality ratio.

**Table A1.2 – List of data used in the study.**

| Data used in the study                                                                                                                                                                                                                                                 | Web source                                                                                                                                                                                                                                                                                                                                                                                                                                                |
|------------------------------------------------------------------------------------------------------------------------------------------------------------------------------------------------------------------------------------------------------------------------|-----------------------------------------------------------------------------------------------------------------------------------------------------------------------------------------------------------------------------------------------------------------------------------------------------------------------------------------------------------------------------------------------------------------------------------------------------------|
| <b>In-hospital COVID-19 data per department between March 19<sup>th</sup> and May 11<sup>th</sup> 2020</b>                                                                                                                                                             |                                                                                                                                                                                                                                                                                                                                                                                                                                                           |
| Daily cases and Deaths                                                                                                                                                                                                                                                 | <a href="https://www.data.gouv.fr/fr/datasets/donnees-hospitalieres-relatives-a-lepidemie-de-covid-19/">https://www.data.gouv.fr/fr/datasets/donnees-hospitalieres-relatives-a-lepidemie-de-covid-19/</a>                                                                                                                                                                                                                                                 |
| <b>COVID-19-associated death per department from February 7<sup>th</sup> 2020</b>                                                                                                                                                                                      |                                                                                                                                                                                                                                                                                                                                                                                                                                                           |
| Daily deaths                                                                                                                                                                                                                                                           | <a href="https://github.com/opencovid19-fr/data">https://github.com/opencovid19-fr/data</a>                                                                                                                                                                                                                                                                                                                                                               |
| <b>Population</b>                                                                                                                                                                                                                                                      |                                                                                                                                                                                                                                                                                                                                                                                                                                                           |
| Total population estimated in 2020 per department                                                                                                                                                                                                                      | <a href="https://www.insee.fr/fr/statistiques/1893198">https://www.insee.fr/fr/statistiques/1893198</a>                                                                                                                                                                                                                                                                                                                                                   |
| Population age structure estimated in 2020 per department (per 5-year and sex strata)                                                                                                                                                                                  | <a href="https://www.insee.fr/fr/statistiques/1893198">https://www.insee.fr/fr/statistiques/1893198</a>                                                                                                                                                                                                                                                                                                                                                   |
| <b>Baseline intensive-care capacity</b>                                                                                                                                                                                                                                |                                                                                                                                                                                                                                                                                                                                                                                                                                                           |
| Number of intensive-care beds (ICU beds) in 2018                                                                                                                                                                                                                       | <a href="https://drees.solidarites-sante.gouv.fr/etudes-et-statistiques/publications/article/nombre-de-lits-de-reanimation-de-soins-intensifs-et-de-soins-continus-en-france">https://drees.solidarites-sante.gouv.fr/etudes-et-statistiques/publications/article/nombre-de-lits-de-reanimation-de-soins-intensifs-et-de-soins-continus-en-france</a>                                                                                                     |
| <b>Chloroquine and hydroxychloroquine dispensations</b>                                                                                                                                                                                                                |                                                                                                                                                                                                                                                                                                                                                                                                                                                           |
| Number of new chloroquine and hydroxychloroquine dispensations in pharmacies from January 1 <sup>st</sup> to April 19 <sup>th</sup> 2020                                                                                                                               | <a href="https://www.ansm.sante.fr/S-informer/Points-d-information-Points-d-information/Usage-des-medicaments-en-ville-durant-l-epidemie-de-Covid-19-point-de-situation-apres-cinq-semaines-de-confinement-Point-d-information">https://www.ansm.sante.fr/S-informer/Points-d-information-Points-d-information/Usage-des-medicaments-en-ville-durant-l-epidemie-de-Covid-19-point-de-situation-apres-cinq-semaines-de-confinement-Point-d-information</a> |
| <b>Baseline population health and healthcare services</b>                                                                                                                                                                                                              |                                                                                                                                                                                                                                                                                                                                                                                                                                                           |
| Number of total deaths per department between March 19 <sup>th</sup> and May 11 <sup>th</sup> 2018 and 2019                                                                                                                                                            | <a href="https://www.insee.fr/fr/statistiques/4487988?soommaire=4487854">https://www.insee.fr/fr/statistiques/4487988?soommaire=4487854</a>                                                                                                                                                                                                                                                                                                               |
| Availability of healthcare resources: densities of medical doctors, general practitioners, nurses, pharmacies and hospital beds per inhabitants                                                                                                                        | <a href="https://www.insee.fr/fr/statistiques">https://www.insee.fr/fr/statistiques</a>                                                                                                                                                                                                                                                                                                                                                                   |
| Subsidized medical or dependency insurance: proportion of the population covered by Universal Health Insurance (CMU), proportion of the population receiving home nursing care, proportion of the elderly population recipient of the autonomy allowance (APA) at home | <a href="https://www.insee.fr/fr/statistiques">https://www.insee.fr/fr/statistiques</a>                                                                                                                                                                                                                                                                                                                                                                   |
| Ageing index                                                                                                                                                                                                                                                           | <a href="https://www.insee.fr/fr/statistiques">https://www.insee.fr/fr/statistiques</a>                                                                                                                                                                                                                                                                                                                                                                   |

Proportion of hospital stays in endocrinology, cardiology, pneumology and medicine wards <https://cartographie.atih.sante.fr/#c=home>

#### **Economic indicators**

Poverty ratio <https://www.insee.fr/fr/statistiques>  
Median standard of living <https://www.insee.fr/fr/statistiques>  
Unemployment ratio <https://www.insee.fr/fr/statistiques>  
Housing allowance ratio <https://www.insee.fr/fr/statistiques>  
Earned income supplement (RSA) ratio <https://www.insee.fr/fr/statistiques>  
Average amount of the autonomy allowance (APA) <https://www.insee.fr/fr/statistiques>  
Social assistance ratio <https://www.insee.fr/fr/statistiques>

#### **Urbanization**

Proportion of the population living in metropolitan cities <https://www.insee.fr/fr/statistiques>  
Proportion of the population living in multipolar cities <https://www.insee.fr/fr/statistiques>  
Proportion of the population living in remote communes <https://www.insee.fr/fr/statistiques>  
Proportion of the population living in other communes <https://www.insee.fr/fr/statistiques>  
Roads density outside urban areas <https://www.insee.fr/fr/statistiques>  
Surface area <https://www.insee.fr/fr/statistiques>

#### **Climate (% of surface area)**

Mountain; semi-continental and sub-montane; modified oceanic of centre and north plains; altered oceanic; franc oceanic; altered Mediterranean; south-west basin; franc Mediterranean <http://journals.openedition.org/cybergeog/23155>

#### **Spatial**

Shapefiles of administrative departments <https://www.data.gouv.fr/fr/datasets/admin-express/>

---

All URLs were last accessed on December 12<sup>th</sup> 2020

## Appendix 2: Sensitivity analysis on the hierarchical ascendant classification (HAC) on principal component analysis (PCA)

To assess the stability of the HAC on PCA process, we simulated 1000 data samples, with normal distributions for each studied factor. We applied the same classification process, and performed the same univariate analysis, providing 1000 univariate SIR, SMR and SFR estimations for each factor. The 95% intervals of the 1001 estimations are presented in Tables A2.1, A2.2 and A2.3. Results of this sensitivity analysis were the same as results obtained in the main analysis: when a classified variable was associated with the outcome, the estimated standardized ratio was not included in the simulated 2.5 – 97.5 percentile interval.

**Table A2.1 – Simulation analysis: Factors associated with in-hospital COVID-19 incidence rates at the department level in metropolitan France**

| Covariate                                                                                                                                     | Univariate analyses       |                                                 |
|-----------------------------------------------------------------------------------------------------------------------------------------------|---------------------------|-------------------------------------------------|
|                                                                                                                                               | Estimated SIR<br>[95%-CI] | Simulated SIR: Median<br>[2.5-97.5] Percentiles |
| <b>Temporal progression of the epidemic wave across the country and the effect of the national lockdown</b>                                   |                           |                                                 |
| Relative lag between the first COVID-19 associated death and the March 17 <sup>th</sup> lockdown                                              | 1.02<br>[1.004–1.03]      | 0.9997<br>[0.99–1.01]                           |
| <b>Population age structure estimated in 2020 per department</b>                                                                              |                           |                                                 |
| Class 1: high proportion of 25-49 years-old inhabitants                                                                                       | 1<br>[-]                  | 1<br>[-]                                        |
| Class 2: high proportion of <25 years-old                                                                                                     | 0.86<br>[0.64–1.15]       | 0.996<br>[0.76–1.32]                            |
| Class 3: high proportion of 50-85 years-old                                                                                                   | 0.72<br>[0.53–0.99]       | 1.004<br>[0.77–1.31]                            |
| Class 4: high proportion of >85 years-old                                                                                                     | 0.96<br>[0.64–1.42]       | 0.997<br>[0.77–1.31]                            |
| <b>Number of new chloroquine and hydroxychloroquine dispensations in pharmacies from January 1<sup>st</sup> to April 19<sup>th</sup> 2020</b> | 1.001<br>[1.0003–1.001]   | 1<br>[0.9996–1.0004]                            |
| <b>Baseline population health and healthcare services</b>                                                                                     |                           |                                                 |
| Class 1: high proportion of the population receiving at home health assistance                                                                | 1<br>[-]                  | 1<br>[-]                                        |
| Class 2: high health professional density                                                                                                     | 1.19<br>[0.94–1.51]       | 1.002<br>[0.79–1.24]                            |
| Class 3: high proportion of hospital stays                                                                                                    | 1.07<br>[0.82–1.38]       | 0.998<br>[0.79–1.26]                            |
| <b>Economic indicators</b>                                                                                                                    |                           |                                                 |
| Class 1: high median standard of living                                                                                                       | 1<br>[-]                  | 1<br>[-]                                        |
| Class 2: high rate of social assistance                                                                                                       | 1.07<br>[0.87–1.32]       | 1.006<br>[0.80–1.27]                            |
| Class 3: high poverty and unemployment ratios                                                                                                 | 0.97<br>[0.68–1.38]       | 1.004<br>[0.80–1.23]                            |
| <b>Urbanization</b>                                                                                                                           |                           |                                                 |
| Class 1: very high proportion of the population living in metropolitan cities and high roads density                                          | 1<br>[-]                  | 1<br>[-]                                        |
| Class 2: high proportion of the population living in metropolitan cities and lower roads density                                              | 0.48<br>[0.3–0.78]        | 0.993<br>[0.77–1.32]                            |
| Class 3: high proportion of the population living in multipolar cities                                                                        | 0.48<br>[0.29–0.79]       | 0.999<br>[0.77–1.31]                            |
| Class 4: high proportion of the population living in remote communes                                                                          | 0.42<br>[0.24–0.74]       | 0.989<br>[0.75–1.29]                            |
| <b>Climate</b>                                                                                                                                |                           |                                                 |
| Class 1: central plains with modified oceanic climate                                                                                         | 1<br>[-]                  | 1<br>[-]                                        |

|                                                            |                     |                      |
|------------------------------------------------------------|---------------------|----------------------|
| Class 2: oceanic or south-west basin climate               | 0.84<br>[0.56–1.26] | 1.003<br>[0.76–1.31] |
| Class 3: semi-continental, sub-montane or mountain climate | 0.93<br>[0.63–1.36] | 0.994<br>[0.77–1.30] |
| Class 4: Mediterranean climate                             | 1.61<br>[0.86–3.0]  | 0.998<br>[0.76–1.30] |

SIR, standardized incidence ratio;

Simulations (n=1000) were performed on each observed variables according to Normal distributions with the estimated averages and variances. For each simulation set, HAC on PCA were performed and classes were included in univariate analyses, following the method described in the main manuscript, in order to obtain 1000 simulated SIR.

Analyses were conducted using generalized additive models (GAM) with a negative binomial regression, a Gaussian kriging smoother based on geographical coordinates, and the log population as an offset.

**Table A2.2 – Simulation analysis: Factors associated with in-hospital COVID-19 mortality rates at the department level in metropolitan France**

| Covariate                                                                                                                                     | Univariate analyses       |                                                 |
|-----------------------------------------------------------------------------------------------------------------------------------------------|---------------------------|-------------------------------------------------|
|                                                                                                                                               | Estimated SMR<br>[95%-CI] | Simulated SMR: Median<br>[2.5-97.5] Percentiles |
| <b>In-hospital COVID-19 incidence</b>                                                                                                         |                           |                                                 |
| Number of in-hospital cases accumulated from March 19 <sup>th</sup> to May 11 <sup>th</sup> , 2020                                            | 1.0002<br>[1.0001–1.0003] | 1.0<br>[0.9999-1.0001]                          |
| <b>Temporal progression of the epidemic wave across the country and the effect of the national lockdown</b>                                   |                           |                                                 |
| Relative lag between the first COVID-19 associated death and the March 17 <sup>th</sup> lockdown                                              | 1.03<br>[1.01–1.04]       | 0.999<br>[0.99-1.01]                            |
| <b>Population age structure estimated in 2020 per department</b>                                                                              |                           |                                                 |
| Class 1: high proportion of 25-49 years-old inhabitants                                                                                       | 1<br>[-]                  | 1<br>[-]                                        |
| Class 2: high proportion of <25 years-old                                                                                                     | 0.85<br>[0.60–1.20]       | 0.99<br>[0.73-1.40]                             |
| Class 3: high proportion of 50-85 years-old                                                                                                   | 0.74<br>[0.51–1.06]       | 0.995<br>[0.75-1.38]                            |
| Class 4: high proportion of >85 years-old                                                                                                     | 0.96<br>[0.60–1.54]       | 1.004<br>[0.74-1.38]                            |
| <b>Intensive-care capacity</b>                                                                                                                |                           |                                                 |
| Number of intensive-care beds in 2018                                                                                                         | 1.002<br>[1.0004–1.003]   | 1.0<br>[0.999-1.002]                            |
| <b>Number of new chloroquine and hydroxychloroquine dispensations in pharmacies from January 1<sup>st</sup> to April 19<sup>th</sup> 2020</b> |                           |                                                 |
|                                                                                                                                               | 1.001<br>[1.0002–1.001]   | 1.0<br>[0.9995-1.0004]                          |
| <b>Baseline population health and healthcare services</b>                                                                                     |                           |                                                 |
| Class 1: high proportion of the population receiving at home health assistance                                                                | 1<br>[-]                  | 1<br>[-]                                        |
| Class 2: high health professional density                                                                                                     | 1.19<br>[0.94–1.51]       | 1.007<br>[0.76-1.30]                            |
| Class 3: high proportion of hospital stays                                                                                                    | 1.07<br>[0.82–1.38]       | 1.0<br>[0.76-1.30]                              |

SMR, standardized mortality ratio;

Simulations (n=1000) were performed on each observed variables according to Normal distributions with the estimated averages and variances. For each simulation set, HAC on PCA were performed and classes were included in univariate analyses, following the method described in the main manuscript, in order to obtain 1000 simulated SMR.

Analyses were conducted using generalized additive models (GAM) with a negative binomial regression, a Gaussian kriging smoother based on geographical coordinates, and the log population as an offset.

**Table A2.3 – Simulation analysis: Factors associated with in-hospital COVID-19 case fatality rates at the department level in metropolitan France**

| Covariate                                                                                                                                     | Univariate analyses       |                                                 |
|-----------------------------------------------------------------------------------------------------------------------------------------------|---------------------------|-------------------------------------------------|
|                                                                                                                                               | Estimated SFR<br>[95%-CI] | Simulated SFR: Median<br>[2·5-97·5] Percentiles |
| <b>Temporal progression of the epidemic wave across the country and the effect of the national lockdown</b>                                   |                           |                                                 |
| Relative lag between the first COVID-19 associated death and the March 17 <sup>th</sup> lockdown                                              | 1·01<br>[1·002–1·02]      | 1·0<br>[0·995-1·005]                            |
| <b>Population age structure estimated in 2020 per department</b>                                                                              |                           |                                                 |
| Class 1: high proportion of 25-49 years-old inhabitants                                                                                       | 1<br>[-]                  | 1<br>[-]                                        |
| Class 2: high proportion of <25 years-old                                                                                                     | 1·01<br>[0·91–1·13]       | 0·999<br>[0·88-1·12]                            |
| Class 3: high proportion of 50-85 years-old                                                                                                   | 1·08<br>[0·96–1·22]       | 1·001<br>[0·88-1·13]                            |
| Class 4: high proportion of >85 years-old                                                                                                     | 1·11<br>[0·93–1·33]       | 1·002<br>[0·89-1·14]                            |
| <b>Intensive-care capacity</b>                                                                                                                |                           |                                                 |
| Number of intensive-care beds in 2018                                                                                                         | 0·9997<br>[0·999–1·0002]  | 1·0<br>[0·999-1·001]                            |
| <b>Number of new chloroquine and hydroxychloroquine dispensations in pharmacies from January 1<sup>st</sup> to April 19<sup>th</sup> 2020</b> |                           |                                                 |
|                                                                                                                                               | 0·9999<br>[0·9997–1·0001] | 1·0<br>[0·9998-1·0002]                          |
| <b>Baseline population health and healthcare services</b>                                                                                     |                           |                                                 |
| Class 1: high proportion of the population receiving at home health assistance                                                                | 1 [-]                     | 1<br>[-]                                        |
| Class 2: high health professional density                                                                                                     | 1·01<br>[0·91–1·12]       | 0·999<br>[0·90-1·11]                            |
| Class 3: high proportion of hospital stays                                                                                                    | 0·999<br>[0·89–1·12]      | 0·998<br>[0·90-1·11]                            |

SFR, standardized fatality ratio;

Simulations (n=1000) were performed on each observed variables according to Normal distributions with the estimated averages and variances. For each simulation set, HAC on PCA were performed and classes were included in univariate analyses, following the method described in the main manuscript, in order to obtain 1000 simulated SFR.

Analyses were conducted using generalized additive models (GAM) with a negative binomial regression, a Gaussian kriging smoother based on geographical coordinates, and the log population as an offset.

### Appendix 3: Directed acyclic graphs for the selection of covariates included in multivariate analyses

**Figure A3 – Directed acyclic graphs (DAG), for (A) COVID-19 incidence, (B) mortality and (C) case fatality rates.** For each of the three outcomes, the potentials confounders were selected using DAG (<http://dagitty.net>, last accessed on December 12<sup>th</sup> 2020). Blue circles with « I » are outcomes. Empty blue circles are ancestors of outcomes. Green circles are studied exposures. Pink circles are ancestors of both exposures and outcomes. Green links represent causal paths, while pink links represent potential biasing paths.

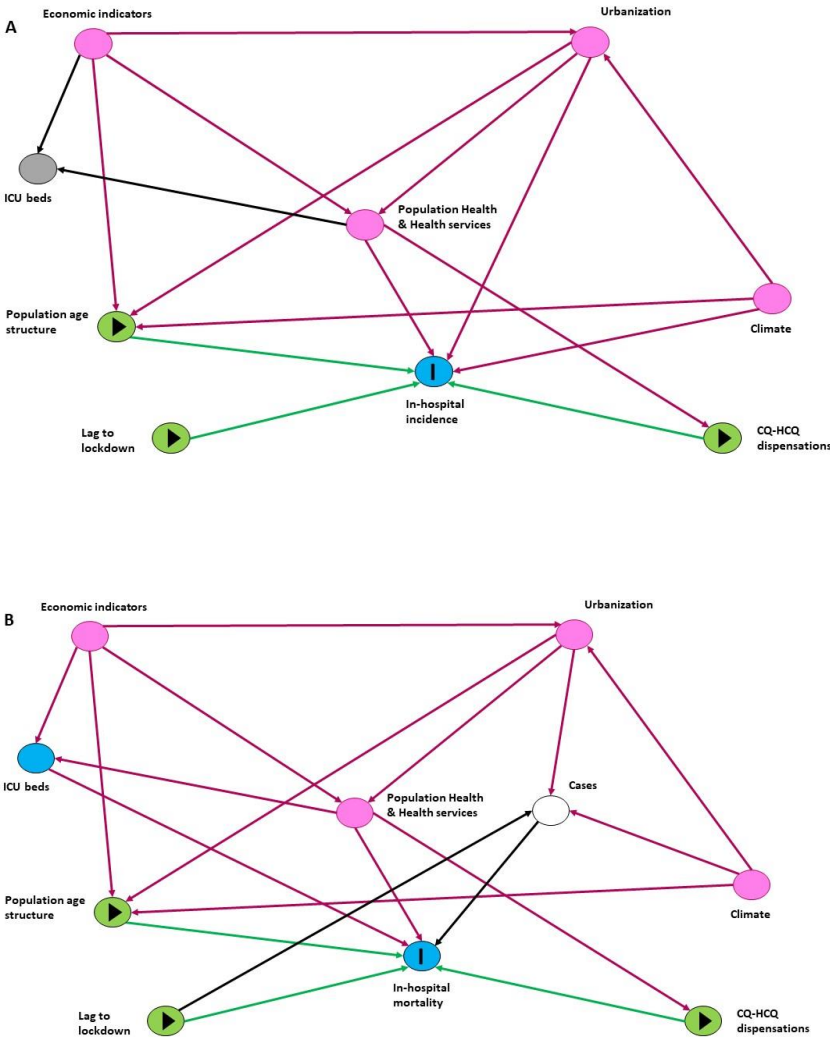



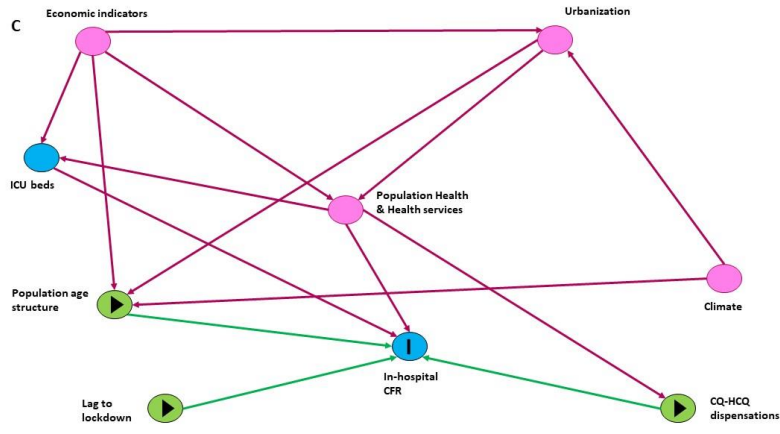

# Appendix 4: Pearsons' residuals for the multivariate models

**Figure A4 – Mapping of the Pearsons' residuals for the (A) in-hospital incidence rate model, (B) in-hospital mortality rate model, and (C) in-hospital case fatality rate model**

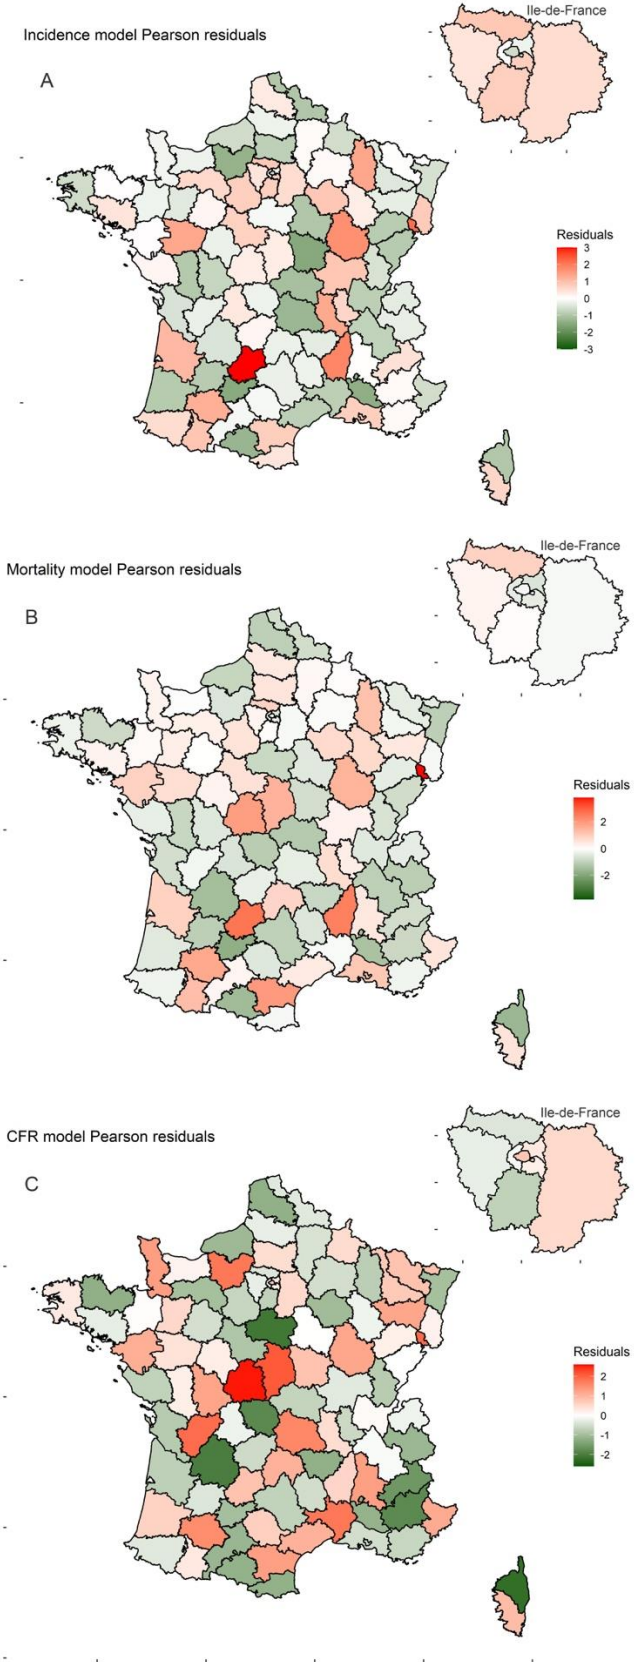

# Appendix 5: Deviation from the nationwide incidence, mortality and case fatality rates

**Figure A5: Estimations of the department deviations from the nationwide (A) incidence rates, (B) mortality rates and (C) case fatality rates**

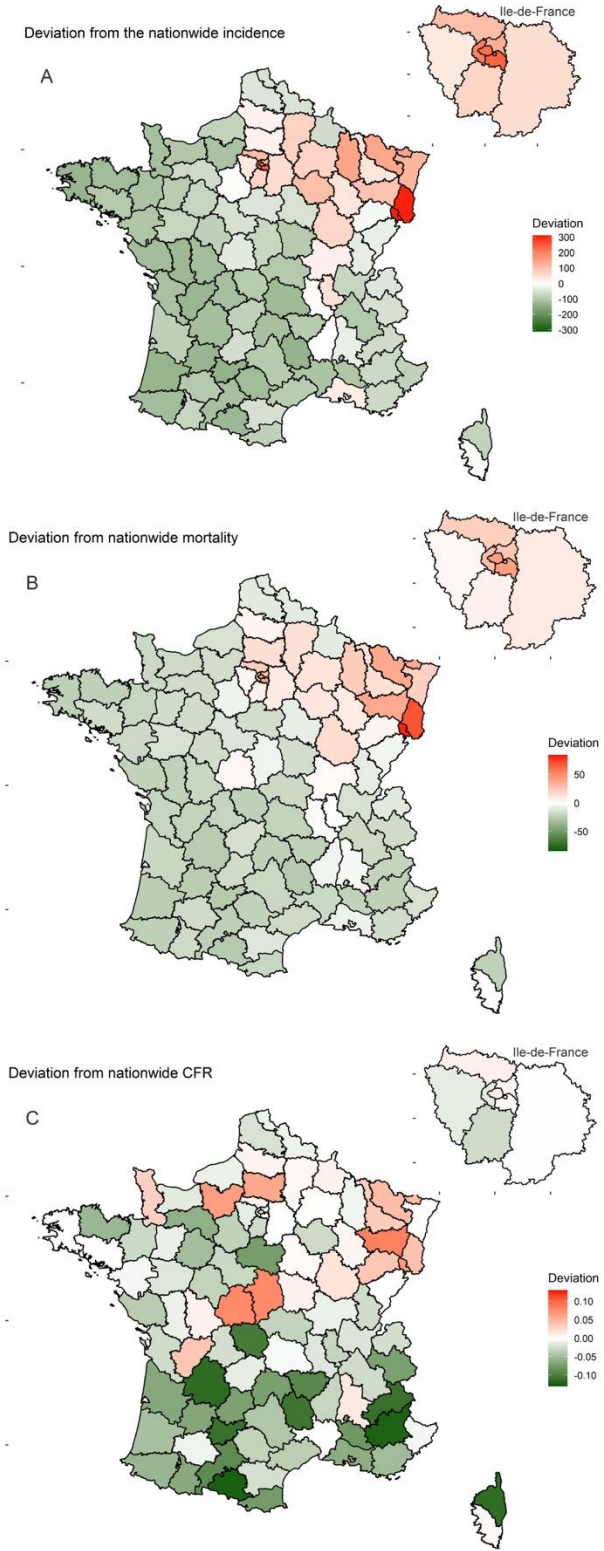

## Appendix 6: Sensitivity analysis by outcome substitution

We used outcome substitution (Table A6.1) in order to assess the impact of ecological bias. No variables were associated to the substitute outcomes (Tables A6.2, A6.3, A6.4), showing that the main results are not impacted by ecological bias.

**Table A6.1 – Sensitivity analysis: outcome substitutions**

| Statistical Model              | Studied Outcome (Offset)               | Substitute Outcome (Offset)                 |
|--------------------------------|----------------------------------------|---------------------------------------------|
| In-hospital incidence rate     | In-hospital cases (Population)         | Emergency allergies (Emergency patients)    |
| In-hospital mortality rate     | In-hospital deaths (Population)        | In-hospital allergies (Emergency patients)  |
| In-hospital case fatality rate | In-hospital deaths (In-hospital cases) | In-hospital allergies (Emergency allergies) |

**Table A6.2 – Factors associated with the number of allergies among patients at the emergency departments, the department level in metropolitan France**

| Covariate                                                                                                                                     | Multivariate analysis     |         |
|-----------------------------------------------------------------------------------------------------------------------------------------------|---------------------------|---------|
|                                                                                                                                               | aSR [95%-CI]              | p-value |
| <b>Temporal progression of the epidemic wave across the country and the effect of the national lockdown</b>                                   |                           |         |
| Relative lag between the first COVID-19 associated death and the March 17 <sup>th</sup> lockdown                                              | 1.005<br>[0.996–1.02]     | 0.25    |
| <b>Population age structure estimated in 2020 per department</b>                                                                              |                           |         |
| Class 1: high proportion of 25-49 years-old inhabitants                                                                                       | 1<br>[-]                  | -       |
| Class 2: high proportion of <25 years-old                                                                                                     | 0.97<br>[0.82–1.14]       | 0.67    |
| Class 3: high proportion of 50-85 years-old                                                                                                   | 0.94<br>[0.73–1.22]       | 0.64    |
| Class 4: high proportion of >85 years-old                                                                                                     | 0.83<br>[0.58–1.19]       | 0.30    |
| <b>Number of new chloroquine and hydroxychloroquine dispensations in pharmacies from January 1<sup>st</sup> to April 19<sup>th</sup> 2020</b> | 0.9999<br>[0.9997–1.0002] | 0.64    |
| <b>Baseline population health and healthcare services</b>                                                                                     |                           |         |
| Class 1: high proportion of the population receiving at home health assistance                                                                | 1<br>[-]                  | -       |
| Class 2: high health professional density                                                                                                     | 0.96<br>[0.83–1.10]       | 0.53    |
| Class 3: high proportion of hospital stays                                                                                                    | 1.11<br>[0.92–1.33]       | 0.27    |
| <b>Urbanization</b>                                                                                                                           |                           |         |
| Class 1: very high proportion of the population living in metropolitan cities and high roads density                                          | 1<br>[-]                  | -       |
| Class 2: high proportion of the population living in metropolitan cities and lower roads density                                              | 1.12<br>[0.88–1.43]       | 0.36    |
| Class 3: high proportion of the population living in multipolar cities                                                                        | 1.14<br>[0.85–1.54]       | 0.38    |
| Class 4: high proportion of the population living in remote communes                                                                          | 1.37<br>[0.92–2.04]       | 0.13    |
| <b>Climate</b>                                                                                                                                |                           |         |
| Class 1: central plains with modified oceanic climate                                                                                         | 1<br>[-]                  | -       |

|                                                            |                     |      |
|------------------------------------------------------------|---------------------|------|
| Class 2: oceanic or south-west basin climate               | 0.98<br>[0.80–1.20] | 0.84 |
| Class 3: semi-continental, sub-montane or mountain climate | 0.96<br>[0.78–1.19] | 0.73 |
| Class 4: Mediterranean climate                             | 1.26<br>[0.90–1.78] | 0.18 |

SR, standardized ratio; aSR, adjusted standardized ratio, adjusted on the different cofactors and spatial structure; 95%-CI, 95%-confidence interval

Analyses were conducted using generalized additive models (GAM) with a negative binomial regression, a Gaussian kriging smoother based on geographical coordinates, and the log number of emergency patients as an offset.

**Table A6.3 – Factors associated with the number of hospitalizations among the number of patients at the emergency departments, the department level in metropolitan France**

| Covariate                                                                                                                                     | Multivariate analysis     |         |
|-----------------------------------------------------------------------------------------------------------------------------------------------|---------------------------|---------|
|                                                                                                                                               | aSR<br>[95%-CI]           | p-value |
| <b>Emergency Allergies</b>                                                                                                                    |                           |         |
| Number of allergy cases at emergency department accumulated from March 1 <sup>st</sup> to April 30 <sup>th</sup> , 2020                       | 1.001<br>[0.99–1.004]     | 0.24    |
| <b>Temporal progression of the epidemic wave across the country and the effect of the national lockdown</b>                                   |                           |         |
| Relative lag between the first COVID-19 associated death and the March 17 <sup>th</sup> lockdown                                              | 1.0004<br>[0.97–1.03]     | 0.98    |
| <b>Population age structure estimated in 2020 per department</b>                                                                              |                           |         |
| Class 1: high proportion of 25-49 years-old inhabitants                                                                                       | 1 [-]                     | -       |
| Class 2: high proportion of <25 years-old                                                                                                     | 1.16<br>[0.75–1.79]       | 0.51    |
| Class 3: high proportion of 50-85 years-old                                                                                                   | 1.06<br>[0.5868–1.9047]   | 0.85    |
| Class 4: high proportion of >85 years-old                                                                                                     | 0.7989<br>[0.3497–1.8255] | 0.59    |
| <b>Intensive-care capacity</b>                                                                                                                |                           |         |
| Number of intensive-care beds in 2018                                                                                                         | 1.0004<br>[0.99–1.006]    | 0.88    |
| <b>Number of new chloroquine and hydroxychloroquine dispensations in pharmacies from January 1<sup>st</sup> to April 19<sup>th</sup> 2020</b> |                           |         |
|                                                                                                                                               | 0.999<br>[0.998–1.001]    | 0.39    |
| <b>Baseline population health and healthcare services</b>                                                                                     |                           |         |
| Class 1: high proportion of the population receiving at home health assistance                                                                | 1 [-]                     | -       |
| Class 2: high health professional density                                                                                                     | 1.03<br>[0.69–1.55]       | 0.88    |
| Class 3: high proportion of hospital stays                                                                                                    | 1.45<br>[0.90–2.31]       | 0.12    |

SR, standardized ratio; SRa, adjusted standardized ratio, adjusted on the different cofactors, spatial structure, and the interaction between allergy cases at emergency department and lag between the first COVID-19 death and lockdown (p=0.2462); 95%-CI, 95%-confidence interval

Analyses were conducted using generalized additive models (GAM) with a negative binomial regression, a Gaussian kriging smoother based on geographical coordinates, and the log number of emergency patients as an offset.

**Table A6.4 – Factors associated with number of hospitalizations among emergency allergies, the department level in metropolitan France**

| Covariate                                                                                                                                     | Multivariate analysis  |         |
|-----------------------------------------------------------------------------------------------------------------------------------------------|------------------------|---------|
|                                                                                                                                               | aSR<br>[CI-95%]        | p-value |
| <b>Temporal progression of the epidemic wave across the country and the effect of the national lockdown</b>                                   |                        |         |
| Relative lag between the first COVID-19 associated death and the March 17 <sup>th</sup> lockdown                                              | 0.99<br>[0.97–1.01]    | 0.27    |
| <b>Population age structure estimated in 2020 per department</b>                                                                              |                        |         |
| Class 1: high proportion of 25-49 years-old inhabitants                                                                                       | 1<br>[-]               | -       |
| Class 2: high proportion of <25 years-old                                                                                                     | 1.06<br>[0.71–1.59]    | 0.78    |
| Class 3: high proportion of 50-85 years-old                                                                                                   | 1.002<br>[0.57–1.76]   | 0.99    |
| Class 4: high proportion of >85 years-old                                                                                                     | 0.76<br>[0.34–1.69]    | 0.50    |
| <b>Intensive-care capacity</b>                                                                                                                |                        |         |
| Number of intensive-care beds in 2018                                                                                                         | 1.0002<br>[0.99–1.01]  | 0.52    |
| <b>Number of new chloroquine and hydroxychloroquine dispensations in pharmacies from January 1<sup>st</sup> to April 19<sup>th</sup> 2020</b> |                        |         |
|                                                                                                                                               | 0.999<br>[0.998–1.001] | 0.38    |
| <b>Baseline population health and healthcare services</b>                                                                                     |                        |         |
| Class 1: high proportion of the population receiving at home health assistance                                                                | 1 [-]                  | -       |
| Class 2: high health professional density                                                                                                     | 1.09<br>[0.73–1.61]    | 0.68    |
| Class 3: high proportion of hospital stays                                                                                                    | 1.28<br>[0.81–2.03]    | 0.29    |

SFR, standardized ratio; aSR, adjusted standardized ratio, adjusted on the different cofactors and spatial structure; 95%-CI, 95%-confidence interval

Analyses were conducted using generalized additive models (GAM) with a negative binomial regression, a Gaussian kriging smoother based on geographical coordinates, and the log of allergy cases at emergency departments as an offset.

## Appendix 7: Characteristics of the classes for the multidimensional variables

**Table A7.1 – Climate**

| <b>Mean (SD)</b>                                  | <b>Class 1<br/>Central plains with<br/>modified oceanic<br/>climate<br/>(n=27)</b> | <b>Class 2<br/>Oceanic or south-<br/>west basin climate<br/>(n=29)</b> | <b>Class 3<br/>Semi-continental,<br/>sub-montane or<br/>mountain climate<br/>(n=27)</b> | <b>Class 4<br/>Mediterranean<br/>climate<br/>(n=13)</b> |
|---------------------------------------------------|------------------------------------------------------------------------------------|------------------------------------------------------------------------|-----------------------------------------------------------------------------------------|---------------------------------------------------------|
| Mountain                                          | 0.16 (0.42)                                                                        | 0.45 (1.13)                                                            | 7.27 (4.51)                                                                             | 2.18 (2.18)                                             |
| Semi-continental<br>and sub-montane               | 0.65 (1.02)                                                                        | 0.17 (1.08)                                                            | 5.52 (3.23)                                                                             | 1.15 (1.17)                                             |
| Modified oceanic<br>of centre and north<br>plains | 14.09 (2.24)                                                                       | 0.55 (1.23)                                                            | 1.63 (2.29)                                                                             | 0.01 (0.01)                                             |
| Altered oceanic                                   | 0.97 (1.60)                                                                        | 7.44 (4.73)                                                            | 1.35 (1.84)                                                                             | 0.45 (1.01)                                             |
| Franc oceanic                                     | 0.23 (0.69)                                                                        | 5.14 (5.6)                                                             | 0.08 (0.22)                                                                             | 0.03 (0.05)                                             |
| Altered<br>Mediterranean                          | 0 (0)                                                                              | 0.31 (0.5)                                                             | 0.17 (0.62)                                                                             | 4.43 (2.29)                                             |
| South-west basin                                  | 0.002 (0.01)                                                                       | 1.79 (3.8)                                                             | 0.13 (0.32)                                                                             | 0.65 (0.98)                                             |
| Franc<br>Mediterranean                            | 0 (0)                                                                              | 0.0003 (0.001)                                                         | 0.03 (0.15)                                                                             | 7.09 (4.74)                                             |

SD, standard deviation

**Table A7·2 – Urbanization**

| <b>Mean (SD)</b>                                           | <b>Class 1<br/>Very high<br/>proportion of the<br/>population living<br/>in metropolitan<br/>cities and high<br/>roads density<br/>(Paris area) (n=4)</b> | <b>Class 2<br/>High proportion of<br/>the population<br/>living in<br/>metropolitan cities<br/>and lower roads<br/>density<br/>(n = 48)</b> | <b>Class 3<br/>High proportion of<br/>the population<br/>living in multipolar<br/>cities<br/>(n =32)</b> | <b>Class 4<br/>High proportion of<br/>the population<br/>living in remote<br/>communes<br/>(n=12)</b> |
|------------------------------------------------------------|-----------------------------------------------------------------------------------------------------------------------------------------------------------|---------------------------------------------------------------------------------------------------------------------------------------------|----------------------------------------------------------------------------------------------------------|-------------------------------------------------------------------------------------------------------|
| Proportion of the population living in metropolitan cities | 100 (0)                                                                                                                                                   | 86·3 (8·35)                                                                                                                                 | 57·19 (8·67)                                                                                             | 38·49 (14·25)                                                                                         |
| Proportion of the population living in multipolar cities   | 0 (0)                                                                                                                                                     | 3·95 (2·64)                                                                                                                                 | 13·74 (4·25)                                                                                             | 9·37 (3·88)                                                                                           |
| Proportion of the population living in remote communes     | 0 (0)                                                                                                                                                     | 3·63 (4·23)                                                                                                                                 | 11·47 (4·9)                                                                                              | 29·68 (9·88)                                                                                          |
| Proportion of the population living in other communes      | 0 (0)                                                                                                                                                     | 6·13 (3·79)                                                                                                                                 | 17·62 (5·34)                                                                                             | 22·47 (10·31)                                                                                         |
| Roads density outside urban areas                          | 11·59 (2·60)                                                                                                                                              | 2·23 (0·58)                                                                                                                                 | 1·88 (0·53)                                                                                              | 1·67 (0·5)                                                                                            |
| Surface area                                               | 191 (65)                                                                                                                                                  | 5561 (1841)                                                                                                                                 | 6435 (1105)                                                                                              | 5863 (1146)                                                                                           |

SD, standard deviation



**Table A7.3 – Baseline population health & healthcare service**

| <b>Mean (SD)</b>                                                                       | <b>Class 1<br/>High proportion of the<br/>population receiving at<br/>home health assistance<br/>(n=26)</b> | <b>Class 2<br/>High health professional<br/>density<br/>(n=36)</b> | <b>Class 3<br/>High proportion of<br/>hospital stays<br/>(n=34)</b> |
|----------------------------------------------------------------------------------------|-------------------------------------------------------------------------------------------------------------|--------------------------------------------------------------------|---------------------------------------------------------------------|
| Basal number of total deaths per department                                            | 2244 (937)                                                                                                  | 3156 (1803)                                                        | 1457 (990)                                                          |
| Densities of medical doctors                                                           | 261 (55)                                                                                                    | 382 (94)                                                           | 257 (29)                                                            |
| Densities of general practitioners                                                     | 128 (22)                                                                                                    | 172 (23)                                                           | 143 (18)                                                            |
| Densities of nurses                                                                    | 845 (150)                                                                                                   | 1192 (176)                                                         | 1106 (173)                                                          |
| Densities of pharmacies                                                                | 97 (11)                                                                                                     | 121 (17)                                                           | 107 (13)                                                            |
| Densities of hospital beds                                                             | 309 (60)                                                                                                    | 439 (72)                                                           | 360 (63)                                                            |
| Proportion of the population covered by Universal Health Insurance (CMU)               | 6.55 (2.24)                                                                                                 | 7.45 (2.30)                                                        | 7.41 (2.06)                                                         |
| Proportion of the population receiving home nursing care                               | 19.14 (2.46)                                                                                                | 20.40 (4.48)                                                       | 23.29 (3.58)                                                        |
| Proportion of the elderly population recipient of the autonomy allowance (APA) at home | 20.56 (6.01)                                                                                                | 19.23 (4.02)                                                       | 13.80 (3.92)                                                        |
| Ageing index                                                                           | 80.68 (22.27)                                                                                               | 95.31 (18.90)                                                      | 121.67 (22.55)                                                      |
| Proportion of hospital stays in endocrinology wards                                    | 0.005 (0.001)                                                                                               | 0.005 (0.001)                                                      | 0.006 (0.002)                                                       |
| Proportion of hospital stays in cardiology wards                                       | 0.01 (0.002)                                                                                                | 0.01 (0.002)                                                       | 0.02 (0.002)                                                        |
| Proportion of hospital stays in pneumology wards                                       | 0.01 (0.001)                                                                                                | 0.01 (0.002)                                                       | 0.02 (0.002)                                                        |
| Proportion of hospital stays in medicine wards                                         | 0.15 (0.01)                                                                                                 | 0.16 (0.01)                                                        | 0.18 (0.01)                                                         |

SD, standard deviation

**Table A7·4 – Economy**

| <b>Mean (SD)</b>                               | <b>Class 1<br/>High median standard<br/>of living<br/>(n=45)</b> | <b>Class 2<br/>high rate of social<br/>assistance<br/>(n=38)</b> | <b>Class 3<br/>high poverty and<br/>unemployment ratios<br/>(n=13)</b> |
|------------------------------------------------|------------------------------------------------------------------|------------------------------------------------------------------|------------------------------------------------------------------------|
| Poverty ratio                                  | 12·5 (1·71)                                                      | 15·32 (1·60)                                                     | 20·04 (2·76)                                                           |
| Median standard of living                      | 21525 (1676)                                                     | 19791 (509)                                                      | 18917 (813)                                                            |
| Unemployment ratio                             | 7·24 (0·84)                                                      | 8·19 (1·22)                                                      | 11·18 (1·11)                                                           |
| Housing allowance ratio                        | 18·49 (2·09)                                                     | 18·01 (2·49)                                                     | 18·8 (1·93)                                                            |
| Earned income supplement (RSA) ratio           | 3·95 (0·99)                                                      | 4·97 (1·09)                                                      | 8·15 (1·17)                                                            |
| Average amount of the autonomy allowance (APA) | 81·7 (20·9)                                                      | 128·6 (34·4)                                                     | 103·9 (21·9)                                                           |
| Social assistance ratio                        | 509 (49)                                                         | 622 (72)                                                         | 704 (68)                                                               |

SD, standard deviation

**Table A7-5 – Population structure**

| <b>Mean (sd)</b> | <b>Class 1<br/>high proportion of<br/>25-49 years-old<br/>inhabitants<br/>(n=16)</b> | <b>Class 2<br/>high proportion of<br/>&lt;25 years-old<br/>(n=32)</b> | <b>Class 3<br/>high proportion of<br/>50-85 years-old<br/>(n=35)</b> | <b>Class 4<br/>high proportion of<br/>&gt;85 years-old<br/>(n=13)</b> |
|------------------|--------------------------------------------------------------------------------------|-----------------------------------------------------------------------|----------------------------------------------------------------------|-----------------------------------------------------------------------|
| Men 0-4          | 0.032 (0.004)                                                                        | 0.027 (0.001)                                                         | 0.024 (0.001)                                                        | 0.025 (0.001)                                                         |
| Men 5-9          | 0.034 (0.004)                                                                        | 0.031 (0.001)                                                         | 0.028 (0.001)                                                        | 0.03 (0.001)                                                          |
| Men 10-14        | 0.033 (0.004)                                                                        | 0.032 (0.002)                                                         | 0.030 (0.002)                                                        | 0.027 (0.001)                                                         |
| Men 15-19        | 0.032 (0.003)                                                                        | 0.033 (0.002)                                                         | 0.029 (0.002)                                                        | 0.027 (0.002)                                                         |
| Men 20-24        | 0.031 (0.004)                                                                        | 0.029 (0.004)                                                         | 0.023 (0.002)                                                        | 0.021 (0.002)                                                         |
| Men 25-29        | 0.031 (0.005)                                                                        | 0.026 (0.002)                                                         | 0.023 (0.001)                                                        | 0.021 (0.002)                                                         |
| Men 30-34        | 0.033 (0.003)                                                                        | 0.028 (0.002)                                                         | 0.026 (0.001)                                                        | 0.023 (0.001)                                                         |
| Men 35-39        | 0.034 (0.002)                                                                        | 0.030 (0.001)                                                         | 0.028 (0.001)                                                        | 0.025 (0.001)                                                         |
| Men 40-44        | 0.032 (0.002)                                                                        | 0.029 (0.001)                                                         | 0.028 (0.001)                                                        | 0.026 (0.001)                                                         |
| Men 45-49        | 0.034 (0.001)                                                                        | 0.033 (0.001)                                                         | 0.033 (0.001)                                                        | 0.033 (0.001)                                                         |
| Men 50-54        | 0.032 (0.002)                                                                        | 0.032 (0.001)                                                         | 0.034 (0.001)                                                        | 0.034 (0.001)                                                         |
| Men 55-59        | 0.03 (0.002)                                                                         | 0.032 (0.002)                                                         | 0.034 (0.001)                                                        | 0.035 (0.002)                                                         |
| Men 60-64        | 0.025 (0.002)                                                                        | 0.03 (0.002)                                                          | 0.034 (0.002)                                                        | 0.037 (0.002)                                                         |
| Men 65-69        | 0.022 (0.002)                                                                        | 0.028 (0.002)                                                         | 0.034 (0.002)                                                        | 0.038 (0.002)                                                         |
| Men 70-74        | 0.019 (0.002)                                                                        | 0.025 (0.002)                                                         | 0.030 (0.002)                                                        | 0.034 (0.002)                                                         |
| Men 75-79        | 0.012 (0.002)                                                                        | 0.015 (0.001)                                                         | 0.018 (0.002)                                                        | 0.021 (0.001)                                                         |
| Men 80-84        | 0.009 (0.001)                                                                        | 0.012 (0.001)                                                         | 0.015 (0.001)                                                        | 0.017 (0.001)                                                         |
| Men 85-89        | 0.006 (0.001)                                                                        | 0.008 (0.001)                                                         | 0.010 (0.001)                                                        | 0.012 (0.001)                                                         |
| Men 90-94        | 0.002 (0.0004)                                                                       | 0.003 (0.001)                                                         | 0.004 (0.001)                                                        | 0.005 (0.0004)                                                        |
| Men >94          | 0.001 (0.0001)                                                                       | 0.001 (0.0002)                                                        | 0.001 (0.0002)                                                       | 0.012 (0.0002)                                                        |
| Women 0-4        | 0.030 (0.004)                                                                        | 0.026 (0.001)                                                         | 0.022 (0.001)                                                        | 0.019 (0.001)                                                         |
| Women 5-9        | 0.032 (0.004)                                                                        | 0.030 (0.002)                                                         | 0.027 (0.001)                                                        | 0.023 (0.001)                                                         |
| Women 10-14      | 0.032 (0.003)                                                                        | 0.031 (0.002)                                                         | 0.028 (0.002)                                                        | 0.026 (0.001)                                                         |
| Women 15-19      | 0.031 (0.002)                                                                        | 0.031 (0.002)                                                         | 0.026 (0.002)                                                        | 0.024 (0.001)                                                         |
| Women 20-24      | 0.031 (0.006)                                                                        | 0.027 (0.005)                                                         | 0.020 (0.003)                                                        | 0.017 (0.001)                                                         |
| Women 25-29      | 0.033 (0.006)                                                                        | 0.026 (0.002)                                                         | 0.022 (0.002)                                                        | 0.019 (0.001)                                                         |
| Women 30-34      | 0.035 (0.003)                                                                        | 0.029 (0.002)                                                         | 0.026 (0.002)                                                        | 0.023 (0.001)                                                         |
| Women 35-39      | 0.036 (0.002)                                                                        | 0.032 (0.001)                                                         | 0.029 (0.002)                                                        | 0.026 (0.001)                                                         |
| Women 40-44      | 0.033 (0.002)                                                                        | 0.030 (0.001)                                                         | 0.028 (0.001)                                                        | 0.027 (0.001)                                                         |
| Women 45-49      | 0.035 (0.002)                                                                        | 0.033 (0.001)                                                         | 0.034 (0.001)                                                        | 0.033 (0.001)                                                         |
| Women 50-54      | 0.033 (0.001)                                                                        | 0.033 (0.001)                                                         | 0.035 (0.001)                                                        | 0.034 (0.001)                                                         |
| Women 55-59      | 0.031 (0.001)                                                                        | 0.033 (0.001)                                                         | 0.036 (0.001)                                                        | 0.037 (0.001)                                                         |
| Women 60-64      | 0.028 (0.002)                                                                        | 0.032 (0.001)                                                         | 0.036 (0.001)                                                        | 0.039 (0.002)                                                         |
| Women 65-69      | 0.025 (0.002)                                                                        | 0.032 (0.001)                                                         | 0.036 (0.002)                                                        | 0.04 (0.002)                                                          |
| Women 70-74      | 0.022 (0.003)                                                                        | 0.028 (0.002)                                                         | 0.034 (0.002)                                                        | 0.037 (0.002)                                                         |
| Women 75-79      | 0.015 (0.002)                                                                        | 0.018 (0.001)                                                         | 0.022 (0.002)                                                        | 0.025 (0.001)                                                         |
| Women 80-84      | 0.013 (0.002)                                                                        | 0.017 (0.001)                                                         | 0.021 (0.001)                                                        | 0.024 (0.001)                                                         |
| Women 85-89      | 0.010 (0.002)                                                                        | 0.014 (0.001)                                                         | 0.017 (0.001)                                                        | 0.020 (0.001)                                                         |
| Women 90-94      | 0.005 (0.001)                                                                        | 0.007 (0.001)                                                         | 0.009 (0.001)                                                        | 0.012 (0.001)                                                         |
| Women >94        | 0.002 (0.001)                                                                        | 0.002 (0.001)                                                         | 0.004 (0.001)                                                        | 0.004 (0.001)                                                         |

### Appendix 8: Maximum intensive-care beds occupancy

In order to study whether scaling up of intensive-care capacities during the epidemic wave could explain why no association between the basal ICU capacities and mortality and CFR rates was identified in our models, we calculated the maximum ICU beds occupancy per department during the March 19<sup>th</sup> – May 11<sup>th</sup> period.

We downloaded the publicly available database of the daily number of hospitalized patients in ICU (<https://www.data.gouv.fr/fr/datasets/donnees-hospitalieres-relatives-a-lepidemie-de-covid-19/>, accessed November 15<sup>th</sup> 2020), and divided the maximum daily number of ICU patients by the number of intensive-care beds (ICU beds) in 2018.

As illustrated on Figure A6, the ICU beds occupancy rate of COVID-19 patients exceeded 100% in 63 out of the 96 French metropolitan departments and exceeded 200% in 21 of them. This means that hospitals could scale up their ICU beds capacities by  $\geq 100\%$  in at least 21 departments.

**Figure A8 – Distribution of the department maximum intensive-care beds occupancy rate by COVID-19 patients**

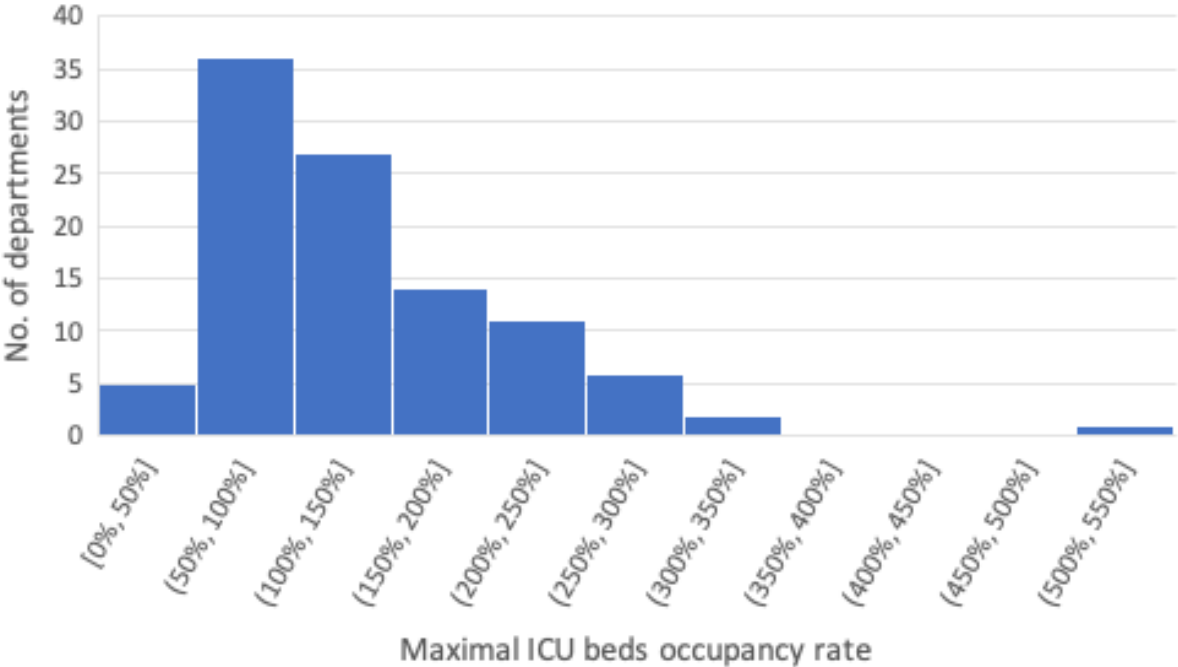

Supplement: mmc1.pdf [file mmc1.pdf]
